# Supplementary material for: Photoelectron spectroscopy of the deprotonated tryptophan anion: the contribution of deprotomers to its photodetachment channels
Source: Royal Society of Chemistry journal article supplement (doi:10.1039/d4cp00309h), 2024-01-01
Supplement: d4cp00309h1.pdf [file d4cp00309h1.pdf]

## Supplementary information for “photoelectron spectroscopy of the deprotonated tryptophan anion: the contribution of deprotomers to its photodetachment channels”

Jemma A. Gibbard,<sup>1\*</sup> Catherine S. Kellow<sup>1</sup> and Jan. R. R. Verlet<sup>1,2</sup>

<sup>1</sup> Department of Chemistry, Durham University, Durham DH1 3LE, United Kingdom

<sup>2</sup> J. Heyrovský Institute of Physical Chemistry, Czech Academy of Sciences, Dolejškova 3, 18223 Prague 8, Czech Republic

Email: jemma.gibbard@durham.ac.uk

Table S1: The vertical excitation energies (VEE) and oscillator strength ( $f$ ) of Trp(I)<sup>-</sup> and Trp(II)<sup>-</sup> calculated at different levels of theory.

| Method                 | Trp(I) <sup>-</sup> VEE ( $f$ ) | Trp(II) <sup>-</sup> VEE/eV ( $f$ ) |
|------------------------|---------------------------------|-------------------------------------|
| B3LYP/aug-cc-pVTZ      | 4.22 (0.0242)                   | 4.18 (0.0139)                       |
| B3LYP/6-311G++         | 4.07 (0.0135)                   | 3.96 (0.0213)                       |
| Cam-B3LYP/ aug-cc-pVTZ | 4.48 (0.0325)                   | 4.15 (0.0207)                       |

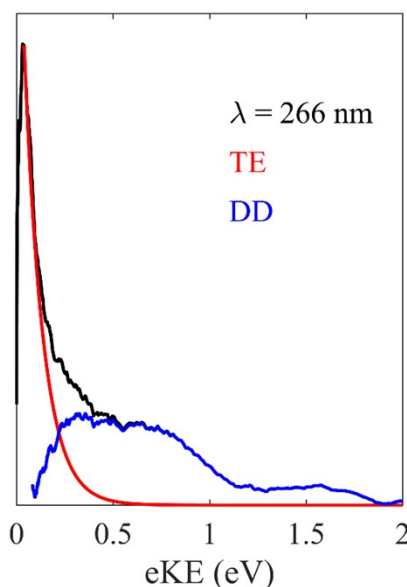

Figure S1: The contributions of direct detachment (blue) and thermionic emission (red) to the  $h\nu = 4.66$  eV photoelectron spectrum of tryptophan. The thermionic emission has been fit by an exponential function and the direct detachment is the difference between the data and the fit.
